# Supplementary material for: Combined heterozygous loss of Ebf1 and Pax5 allows for T-lineage conversion of B cell progenitors
Source: PubMed Central journal article supplement — J Exp Med. 2015 Jun 29;212(7):1109–23. doi: 10.1084/jem.20132100 (PMC4493409; doi:10.1084/jem.20132100), 2015-06-29
Supplement: supp_jem.20132100_JEM_20132100_sm.pdf [file supp_jem.20132100_JEM_20132100_sm.pdf]

SUPPLEMENTAL MATERIAL

Ungerbäck et al., <http://www.jem.org/cgi/content/full/jem.20132100/DC1>

**Table S1.** Analysis of Ebf1 ChIP-seq data in *Wt*, *TH* (*Ebf1*<sup>+/-</sup> *Pax5*<sup>+/-</sup>), *Ebf1*<sup>+/-</sup> and *Pax5*<sup>+/-</sup> pro-B cells

|                            | Enriched motif                                                                      | p-value               | % targets/<br>background | Motif                |
|----------------------------|-------------------------------------------------------------------------------------|-----------------------|--------------------------|----------------------|
| <i>Wt</i>                  |    | $1 \times 10^{-4878}$ | 65/5                     | EBF                  |
|                            |    | $1 \times 10^{-337}$  | 31/14                    | Fli1(ETS)            |
|                            |    | $1 \times 10^{-167}$  | 13/5                     | RUNX1(Runt)          |
|                            |    | $1 \times 10^{-118}$  | 11/5                     | E2A(bHLH)            |
| <i>TH</i>                  |    | $1 \times 10^{-5013}$ | 73/5                     | EBF                  |
|                            |    | $1 \times 10^{-433}$  | 33/13                    | ERG(ETS)             |
|                            |    | $1 \times 10^{-248}$  | 22/9                     | RUNX2                |
|                            |  | $1 \times 10^{-72}$   | 3/0.5                    | Oct4                 |
| <i>Ebf</i> <sup>+/-</sup>  |  | $1 \times 10^{-3407}$ | 51/3                     | EBF                  |
|                            |  | $1 \times 10^{-315}$  | 29/12                    | Ets1-<br>distal(ETS) |
|                            |  | $1 \times 10^{-146}$  | 24/13                    | RUNX1(Runt)          |
|                            |  | $1 \times 10^{-77}$   | 16/10                    | Ptf1a(bHLH)          |
| <i>Pax5</i> <sup>+/-</sup> |  | $1 \times 10^{-6178}$ | 44/5                     | EBF                  |
|                            |  | $1 \times 10^{-940}$  | 29/12                    | ETS1(ETS)            |
|                            |  | $1 \times 10^{-443}$  | 16/7                     | RUNX1(Runt)          |
|                            |  | $1 \times 10^{-208}$  | 20/12                    | E2A(bHLH)            |

Duplicate experiments in each genotype were combined into one sequence file. Motif analysis on peak files generated from Ebf1 ChIP-seq on indicated genotypes resulted in Ebf1 as top enriched motif in all 4 genotypes, top 4 motifs are illustrated.
